# Supplementary material for: Effects of human disturbance on habitat and fish diversity in Neotropical streams
Source: PLoS One. 2022 Sep 9;17(9):e0274191. doi: 10.1371/journal.pone.0274191 (PMC9462761; doi:10.1371/journal.pone.0274191)
Supplement: S1 File — (PDF) [file pone.0274191.s003.pdf]

# Effects of human disturbance on habitat and fish diversity in Neotropical streams

Crislei Larentis<sup>1¶</sup>, Bruna Caroline Kotz Kliemann<sup>2¶</sup>, Mayara Pereira Neves<sup>3¶</sup> and Rosilene Luciana Delariva<sup>4¶\*</sup>

<sup>1</sup>Programa de Pós-Graduação em Biologia Comparada, Universidade Estadual de Maringá, Maringá, Paraná, Brazil.

<sup>2</sup>Programa de Pós-graduação em Ciências Biológicas/Zoologia, Instituto de Biociências, Universidade Estadual Paulista (UNESP), Botucatu, São Paulo, Brazil.

<sup>3</sup>Programa de Pós-graduação em Biologia Animal, Universidade Federal do Rio Grande do Sul, Porto Alegre, Rio Grande do Sul, Brazil.

<sup>4</sup>Laboratório de Ictiologia, Ecologia e Biomonitoramentos (LIEB), Universidade Estadual do Oeste do Paraná – UNIOESTE, Cascavel, Paraná, Brazil.

\*Corresponding author

Email: rosilene.delariva@unioeste.br

¶These authors contributed equally to this work.

**S1 File. Protocol for Rapid Habitat Diversity Assessment (RHDA, applied in stretches of sampling sites during this study.**

|                                                |
|------------------------------------------------|
| <b>DESCRIÇÃO DO AMBIENTE</b>                   |
| Localização:                                   |
| Data da Coleta: ____/____/____ Hora da Coleta: |
| Tempo (situação do dia):                       |
| Modo de coleta (coletor):                      |
| Tipo de ambiente: Córrego ( ) Rio ( )          |
| Largura média:                                 |
| Profundidade média:                            |
| Temperatura da água:                           |

| PARÂMETROS                                                                   | PONTUAÇÃO         |                                                                   |                                                                                                           |
|------------------------------------------------------------------------------|-------------------|-------------------------------------------------------------------|-----------------------------------------------------------------------------------------------------------|
|                                                                              | 4 pontos          | 2 pontos                                                          | 0 ponto                                                                                                   |
| <b>1. Tipo de ocupação das margens do corpo d'água (principal atividade)</b> | Vegetação natural | Campo de pastagem/Agricultura/<br>Monocultura/<br>Reflorestamento | Residencial/ Comercial/<br>Industrial                                                                     |
| <b>2. Erosão próxima e/ou nas margens do rio e assoreamento em seu leito</b> | Ausente           | Moderada                                                          | Acentuada                                                                                                 |
| <b>3. Alterações antrópicas</b>                                              | Ausente           | Alterações de origem doméstica (esgoto, lixo)                     | Alterações de origem industrial/ urbana (fábricas, siderurgias, canalização, retificação do curso do rio) |
| <b>4. Cobertura vegetal no leito</b>                                         | Parcial           | Total                                                             | Ausente                                                                                                   |
| <b>5. Odor da água</b>                                                       | Nenhum            | Esgoto (ovo podre)                                                | Óleo/industrial                                                                                           |
| <b>6. Oleosidade da água</b>                                                 | Ausente           | Moderada                                                          | Abundante                                                                                                 |
| <b>7. Transparência da água</b>                                              | Transparente      | Turva/cor de chá-forte                                            | Opaca ou colorida                                                                                         |
| <b>8. Odor do sedimento (fundo)</b>                                          | Nenhum            | Esgoto (ovo podre)                                                | Óleo/industrial                                                                                           |
| <b>9. Oleosidade do fundo</b>                                                | Ausente           | Moderado                                                          | Abundante                                                                                                 |
| <b>10. Tipo de fundo</b>                                                     | Pedras/cascalho   | Lama/areia                                                        | Cimento/canalizado                                                                                        |

| PARÂMETROS                | PONTUAÇÃO                                                              |                                                                |                                       |                                                                                                       |
|---------------------------|------------------------------------------------------------------------|----------------------------------------------------------------|---------------------------------------|-------------------------------------------------------------------------------------------------------|
|                           | 5 pontos                                                               | 3 pontos                                                       | 2 pontos                              | 0 ponto                                                                                               |
| <b>11. Tipos de fundo</b> | Mais de 50% com habitats diversificados; pedaços de troncos submersos; | 30 a 50% de habitats diversificados; habitats adequados para a | 10 a 30% de habitats diversificados ; | Menos que 10% de habitats diversificados; ausência de habitats óbvia; substrato rochoso instável para |

|                                  |                                                                                                                                |                                                                                                |                                                                                                                                                    |                                                                                                                                                   |
|----------------------------------|--------------------------------------------------------------------------------------------------------------------------------|------------------------------------------------------------------------------------------------|----------------------------------------------------------------------------------------------------------------------------------------------------|---------------------------------------------------------------------------------------------------------------------------------------------------|
|                                  | cascalho ou outros habitats estáveis.                                                                                          | manutenção das populações de organismos aquáticos.                                             | disponibilidade de habitats insuficiente; substratos frequentemente modificados.                                                                   | fixação dos organismos.                                                                                                                           |
| <b>12. Extensão de Rápidos</b>   | Rápidos e corredeiras bem desenvolvidas; rápidos tão largos quanto o rio e com o comprimento igual ao dobro da largura do rio. | Rápidos com a largura igual à do rio, mas com comprimento menor que o dobro da largura do rio. | Trechos rápidos podem estar ausentes; rápidos não tão largos quanto o rio e seu comprimento menor que o dobro da largura do rio.                   | Rápidos ou corredeiras inexistentes.                                                                                                              |
| <b>13. Frequência de Rápidos</b> | Rápidos relativamente frequentes; distância entre rápidos dividida pela largura do rio entre 5 e 7.                            | Rápidos não frequentes; distância entre rápidos dividida pela largura do rio entre 7 e 15.     | Rápidos ou corredeiras ocasionais; habitats formados pelos contornos do fundo; distância entre rápidos dividida pela largura do rio entre 15 e 25. | Geralmente com lâmina d'água "lisa" ou com rápidos rasos; pobreza de habitats; distância entre rápidos dividida pela largura do rio maior que 25. |
| <b>14. Tipos de Substrato</b>    | Seixos abundantes (prevalecendo em nascentes).                                                                                 | Seixos abundantes; cascalho comum.                                                             | Fundo formado predominantemente por cascalho; alguns seixos presentes.                                                                             | Fundo pedregoso; seixos ou lamoso.                                                                                                                |

|                                              |                                                                                             |                                                                                                                                                             |                                                                                                                                   |                                                                                                                                                                  |
|----------------------------------------------|---------------------------------------------------------------------------------------------|-------------------------------------------------------------------------------------------------------------------------------------------------------------|-----------------------------------------------------------------------------------------------------------------------------------|------------------------------------------------------------------------------------------------------------------------------------------------------------------|
| <b>15. Deposição de Lama</b>                 | Entre 0 e 25% do fundo coberto por lama.                                                    | Entre 25 e 50% do fundo coberto por lama.                                                                                                                   | Entre 50 e 75% do fundo coberto por lama.                                                                                         | Mais de 75% do fundo coberto por lama.                                                                                                                           |
| <b>16. Depósitos Sedimentares</b>            | Menos de 5% do fundo com deposição de lama; ausência de deposição nos remansos.             | Alguma evidência de modificação no fundo, principalmente e como aumento de cascalho, areia ou lama; 5 a 30% do fundo afetado; suave deposição nos remansos. | Deposição moderada de cascalho novo, areia ou lama nas margens; entre 30 a 50% do fundo afetado; deposição moderada nos remansos. | Grandes depósitos de lama, maior desenvolvimento das margens; mais de 50% do fundo modificado; remansos ausentes devido à significativa deposição de sedimentos. |
| <b>17. Alterações no canal do rio</b>        | Canalização (retificação) ou dragagem ausente ou mínima; rio com padrão normal.             | Alguma canalização presente, normalmente próximo à construção de pontes; evidência de modificações há mais de 20 anos.                                      | Alguma modificação presente nas duas margens; 40 a 80% do rio modificado.                                                         | Margens modificadas; acima de 80% do rio modificado.                                                                                                             |
| <b>18 Características do fluxo das águas</b> | Fluxo relativamente igual em toda a largura do rio; mínima quantidade de substrato exposta. | Lâmina d'água acima de 75% do canal do rio; ou menos de 25% do substrato exposto.                                                                           | Lâmina d'água entre 25 e 75% do canal do rio, e/ou maior parte do substrato nos "rápidos" exposto.                                | Lâmina d'água escassa e presente apenas nos remansos.                                                                                                            |

|                                          |                                                                                                                                                                           |                                                                                                                                                                          |                                                                                                                                                                                |                                                                                                                            |
|------------------------------------------|---------------------------------------------------------------------------------------------------------------------------------------------------------------------------|--------------------------------------------------------------------------------------------------------------------------------------------------------------------------|--------------------------------------------------------------------------------------------------------------------------------------------------------------------------------|----------------------------------------------------------------------------------------------------------------------------|
| <b>19. Presença de mata ciliar</b>       | Acima de 90% com vegetação ripária nativa, incluindo árvores, arbustos ou macrófitas; mínima evidência de desflorestamento; todas as plantas atingindo a altura “normal”. | Entre 70 e 90% com vegetação ripária nativa; desflorestamento evidente mas não afetando o desenvolvimento da vegetação; maioria das plantas atingindo a altura “normal”. | Entre 50 e 70% com vegetação ripária nativa; desflorestamento óbvio; trechos com solo exposto ou vegetação eliminada; menos da metade das plantas atingindo a altura “normal”. | Menos de 50% da mata ciliar nativa; desflorestamento muito acentuado.                                                      |
| <b>20 Estabilidade das Margens</b>       | Margens estáveis; evidência de erosão mínima ou ausente; pequeno potencial para problemas futuros. Menos de 5% da margem afetada.                                         | Moderadamente estáveis; pequenas áreas de erosão frequentes. Entre 5 e 30% da margem com erosão.                                                                         | Moderadamente instável; entre 30 e 60% da margem com erosão. Risco elevado de erosão durante enchentes.                                                                        | Instável; muitas áreas com erosão; frequentes áreas descobertas nas curvas do rio; erosão óbvia entre 60 e 100% da margem. |
| <b>21. Extensão de mata ciliar</b>       | Largura da vegetação ripária maior que 18 m; sem influência de atividades antrópicas (agropecuária, estradas, etc.).                                                      | Largura da vegetação ripária entre 12 e 18 m; mínima influência antrópica.                                                                                               | Largura da vegetação ripária entre 6 e 12 m; influência antrópica intensa.                                                                                                     | Largura da vegetação ripária menor que 6 m; vegetação restrita ou ausente devido à atividade antrópica.                    |
| <b>22. Presença de plantas Aquáticas</b> | Pequenas macrófitas aquáticas e/ou musgos                                                                                                                                 | Macrófitas aquáticas ou algas filamentosas ou musgos distribuídas no rio,                                                                                                | Algas filamentosas ou macrófitas em poucas pedras ou alguns remansos,                                                                                                          | Ausência de vegetação aquática no leito do rio ou grandes bancos macrófitas                                                |

|  |                             |                             |                                       |                 |
|--|-----------------------------|-----------------------------|---------------------------------------|-----------------|
|  | distribuídos pelo<br>leito. | substrato com<br>perifiton. | perifiton<br>abundante e<br>biofilme. | (p.ex. aguapé). |
|--|-----------------------------|-----------------------------|---------------------------------------|-----------------|

Source: Callisto et al. (2002) - the first 10 parameters were adapted from the proposal of Ohio Environmental Protection Agency - USA (EPA,1987), and the other 12 parameters were adapted from the protocol presented by Hannaford et al. (1997).
